# Supplementary material for: Signal Transduction by a Fungal NOD-Like Receptor Based on Propagation of a Prion Amyloid Fold
Source: PubMed Central journal article supplement (PMC4344463; doi:10.1371/journal.pbio.1002059), 2015-02-11

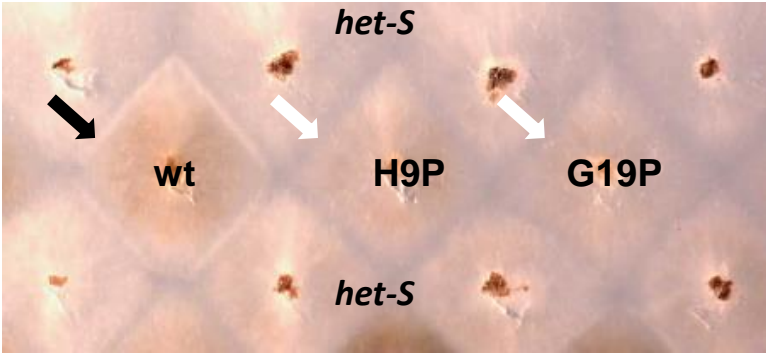

Supplement: pbio.1002059.s006.pdf [file pbio.1002059.s006.pdf]
