# Supplementary material for: Signal Transduction by a Fungal NOD-Like Receptor Based on Propagation of a Prion Amyloid Fold
Source: PubMed Central journal article supplement (PMC4344463; doi:10.1371/journal.pbio.1002059), 2015-02-11
Supplement: pbio.1002059.s009.pdf [file pbio.1002059.s009.pdf]

**Table S1. Genotype of *het-S* wild-isolates for the *nwd2* and *het-c* genes**

| strain | <i>nwd2</i> allele | <i>het-c</i> allele | <i>het-c</i> phenotypic class |
|--------|--------------------|---------------------|-------------------------------|
| Wa7    | <i>nwd2-8</i>      | <i>het-c2</i>       | C2                            |
| Wa11   | <i>nwd2-7</i>      | <i>het-c2</i>       | C2                            |
| Wa13   | <i>nwd2-2</i>      | <i>het-c2</i>       | C2                            |
| Wa15   | <i>nwd2-7</i>      | <i>het-c5</i>       | C1                            |
| Wa20   | <i>nwd2-7</i>      | <i>het-c2</i>       | C2                            |
| Wa21   | <i>nwd2-3</i>      | <i>het-c7</i>       | C7                            |
| Wa25   | <i>nwd2-4</i>      | <i>het-c1</i>       | C1                            |
| Wa28   | <i>nwd2-8</i>      | <i>het-c2</i>       | C2                            |
| Wa43   | <i>nwd2-9</i>      | <i>het-c5</i>       | C1                            |
| Wa44   | <i>nwd2-8</i>      | <i>het-c2</i>       | C2                            |
| Wa46   | <i>nwd2-8</i>      | <i>het-c3</i>       | C3                            |
| Wa47   | <i>nwd2-8</i>      | <i>het-c3</i>       | C3                            |
| Wa62   | <i>nwd2-7</i>      | <i>het-c2</i>       | C2                            |
| Wa63   | <i>nwd2-3</i>      | <i>het-c9</i>       | C9                            |
| Wa67   | <i>nwd2-6</i>      | <i>het-c5</i>       | C1                            |
| Wa69   | <i>nwd2-7</i>      | <i>het-c1</i>       | C1                            |
| Wa71   | <i>nwd2-8</i>      | <i>het-c2</i>       | C2                            |
| Wa72   | <i>nwd2-8</i>      | <i>het-c2</i>       | C2                            |
| Wa76   | <i>nwd2-8</i>      | <i>het-c2</i>       | C2                            |
| Wa78   | <i>nwd2-4</i>      | <i>het-c1</i>       | C1                            |
| Wa79   | <i>nwd2-4</i>      | <i>het-c1</i>       | C1                            |
| Wa85   | <i>nwd2-10</i>     | <i>het-c2</i>       | C2                            |
| Wa86   | <i>nwd2-8</i>      | <i>het-c6</i>       | C3                            |
| Wa88   | <i>nwd2-7</i>      | <i>het-c2</i>       | C2                            |
| Wa93   | <i>nwd2-7</i>      | <i>het-c2</i>       | C2                            |
| Wa94   | <i>nwd2-7</i>      | <i>het-c2</i>       | C2                            |
| Wa95   | <i>nwd2-8</i>      | <i>het-c3</i>       | C3                            |
| Wa99   | <i>nwd2-8</i>      | <i>het-c5</i>       | C1                            |
| Wa101  | <i>nwd2-5</i>      | <i>het-c2</i>       | C2                            |
| Wa102  | <i>nwd2-3</i>      | <i>het-c1</i>       | C1                            |
| Wa105  | <i>nwd2-5</i>      | <i>het-c1</i>       | C1                            |
| Wa114  | <i>nwd2-4</i>      | <i>het-c2</i>       | C2                            |
