# Supplementary material for: Signal Transduction by a Fungal NOD-Like Receptor Based on Propagation of a Prion Amyloid Fold
Source: PubMed Central journal article supplement (PMC4344463; doi:10.1371/journal.pbio.1002059), 2015-02-11
Supplement: pbio.1002059.s010.pdf [file pbio.1002059.s010.pdf]

**Table S2. *nwd2-8* shows no inducing activity in *het-c1*, *het-c2* and *het-c4* backgrounds**

|                           | <i>het-c1</i>       | <i>het-c2</i> | <i>het-c4</i> |
|---------------------------|---------------------|---------------|---------------|
| negative control          | 0 [Het-s]/36 tested | 0/60          | 0/90          |
| <i>nwd2</i> <sup>e1</sup> | nd.                 | 25/59         | 0/90          |
| <i>nwd2</i> <sup>d2</sup> | nd.                 | 0/60          | 100/140       |
| <i>nwd2-8</i>             | 0/59                | 2/90          | 1/30          |
